# Supplementary material for: Influence of Hyperproteinemia on Insect Innate Immune Function of the Circulatory System in Bombyx mori
Source: PubMed Central journal article supplement (PMC7913649; doi:10.3390/biology10020112), 2021-02-03
Supplement: biology-10-00112-s001.pdf [file biology-10-00112-s001.pdf]

# Influence of Hyperproteinemia on Insect Innate Immune Function of the Circulatory System in *Bombyx mori*

Yong-Feng Wang<sup>1,2\*</sup>, Guang Wang<sup>1,2\*</sup>, Jiang-Lan Li<sup>1,2</sup>, Ya-Xin Qu<sup>1</sup>, Xin-Yin Liang<sup>1,2</sup>, Xue-Dong Chen<sup>1,2</sup>, Yang-Hu Sima<sup>1,2</sup> and Shi-Qing Xu<sup>1,2</sup>

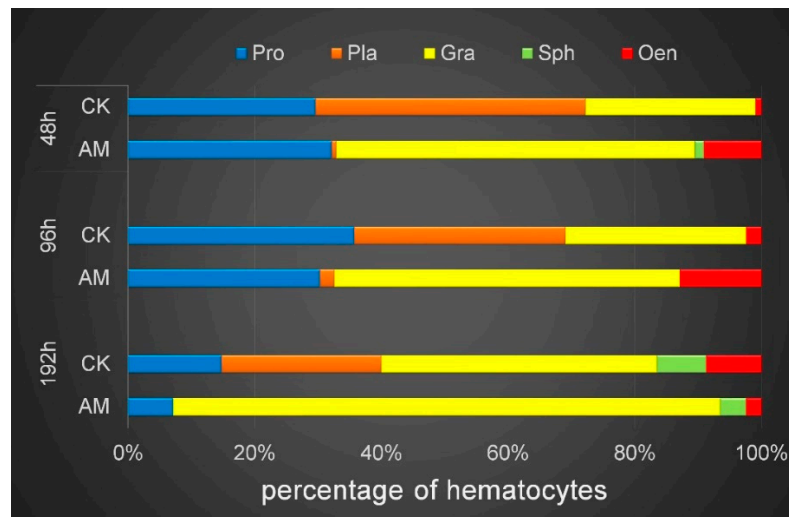

**Figure S1.** The proportion of hemocytes in hemolymph of silkworm after modeling. Pro, prohemocyte; Pla, plasmacyte; Gra, granulocyte; Sph, spherulocyte; Oen, oenocytoid.

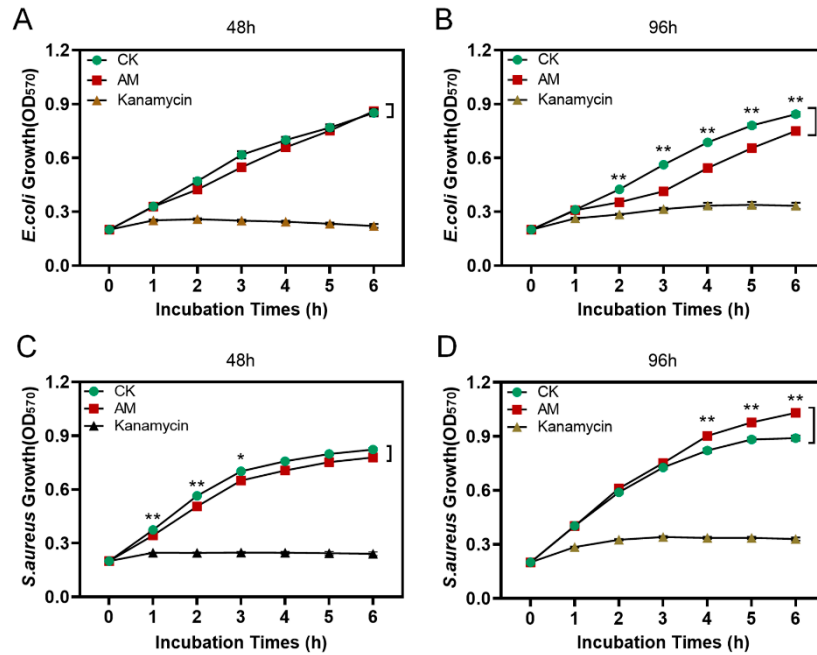

**Figure S2.** Antibacterial activity of high PPC silkworm cell-free hemolymph. The hemolymph of the silkworm was collected for heat treatment at 48 h and 96 h after modeling, and the supernatant was cocultured with *E. coli* and *S. aureus*, and the growth of *E. coli* (A, B) and *S. aureus* (C, D) was investigated. \*  $p < 0.05$ ; \*\*  $p < 0.01$ ; n.s., no significant difference between the two groups. Mean  $\pm$  SEM.  $n = 3$ .

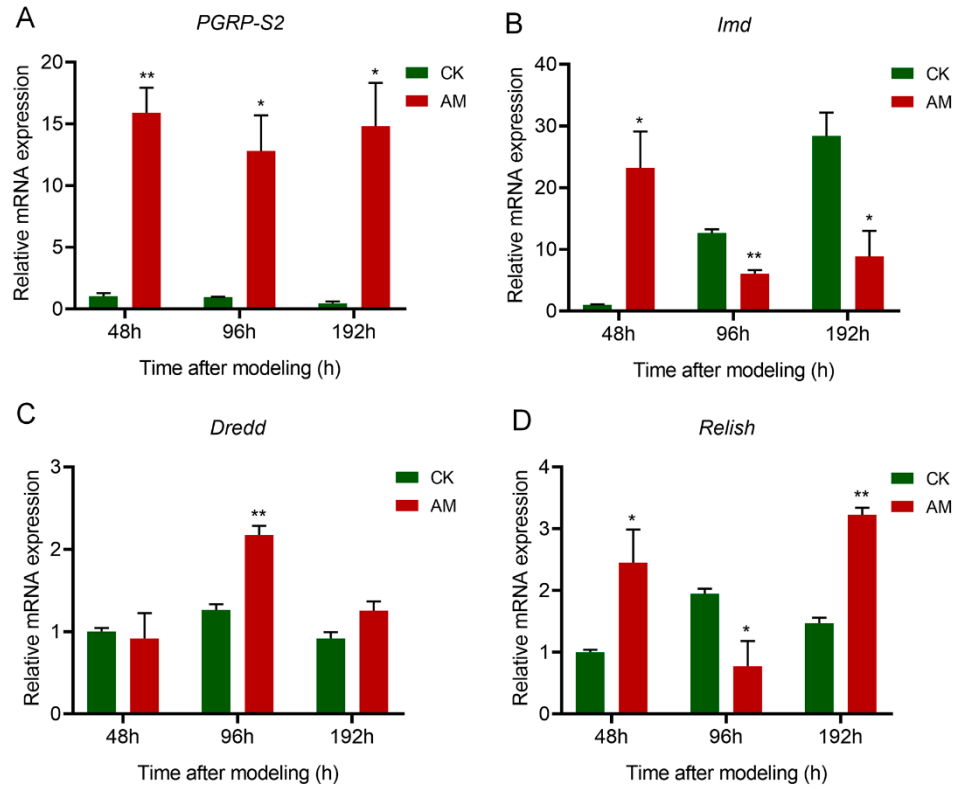

**Figure S3.** High PPC induces Imd signaling pathway. The mRNA levels of (A) *PGRP-S2* and (B) *Imd* and (C) *Dredd* and (D) *Relish* genes in hemocytes detected by qRT-PCR. \*  $p < 0.05$ ; \*\*  $p < 0.01$ . Mean  $\pm$  SEM.  $n = 3$ .

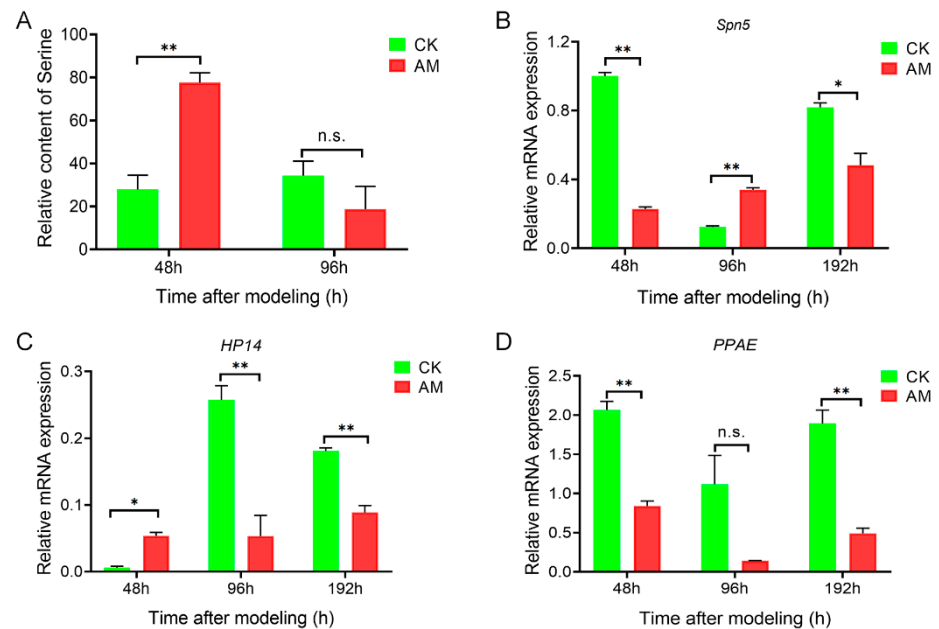

**Figure S4.** High PPC affects the melanization of hemolymph in silkworm. (A) Relative content of Serine in hemolymph at 48 h and 96 h after modeling. Serine content was determined by GC-MS method. (B-D) the mRNA levels of *Spn5*, *HP14* and *PPAE* in hemocytes after modeling. \*  $p < 0.05$ ; \*\*  $p < 0.01$ ; n.s., no significant difference between the two groups. Mean  $\pm$  SEM.  $n = 3$ .

**Table S1.** qPCR primers used in this part.

| <b>Genes</b>                           | <b>Primers</b> | <b>Sequences</b>       |
|----------------------------------------|----------------|------------------------|
| spatzle-1                              | SPZ1-F         | AGGAAGCATCCCCGAAGTCAA  |
|                                        | SPZ1-R         | TTCTCGCCCAACTTAGCAAC   |
| toll-like receptor 4                   | TLR-4-F        | CATAGAGGCAGGAGTGTTTA   |
|                                        | TLR-4-R        | ACGAAAGCGTCTTCTGGTAT   |
| MyD88                                  | MyD88-F        | ATAGACTCGGAGGAATG      |
|                                        | MyD88-R        | GATACTAATAGCCTGTGC     |
| Dorsal                                 | Dorsal-F       | CAAGCAGGTCGCCGTGGTGT   |
|                                        | Dorsal-R       | CGTCGTCCGTCAGCCTCTTCA  |
| peptidoglycan recognition protein S2   | PGRP-S2-F      | TTTCATTGGCGACTTTAGGG   |
|                                        | PGRP-S2-R      | GCTCCAGGACTTAGCGTGT    |
| immune deficiency                      | IMD-R          | AGCGCCTTTGAAGCCAATGT   |
|                                        | IMD-F          | TTTCGCCTGTGGCTACTCCA   |
| death related ced-3/Nedd2-like protein | Dredd-F        | GCAAGATGAGCCGTATGACA   |
|                                        | Dredd-R        | AATAAGAAGTGCCTCCAGGAC  |
| Relish                                 | Relish -F      | CCGATGAATCAGGCAACAC    |
|                                        | Relish -R      | CCGTCTTCGAAGGCGATAG    |
| Lebocin                                | Lebocin-F      | GAAGGTATGTTTCGCAGTGTCA |
|                                        | Lebocin-R      | CTTGTGTTACGGTGGCTCTC   |
| defensin-like protein 2                | Defensin 2-F   | GAGCCGTGTACGAGTGAACA   |
|                                        | Defensin 2-R   | TAAGGCCCTCCTGGATCGAA   |
| phenoloxidase subunit 1                | PPO1-F         | CCTCTTGGCTGGGGTTTCTAC  |
|                                        | PPO1-R         | TCCACGCAGTCCGTCTCG     |
| phenoloxidase subunit 2                | PPO2-F         | GCTTTTGACTGAGGACTACGCC |
|                                        | PPO2-R         | CGCTGAGGTTCTTGAGGGGTA  |
| ribosomal protein 49                   | Rp49-F         | TACGGAATCCATTTGGGAGCAT |
|                                        | Rp49-R         | CAGGCGGTTCAAGGGTCAATC  |
| hemolymph protease-14                  | HP14-F         | CTTCTCCCGTAGGTTTCTGC   |
|                                        | HP14-R         | TCCTCCAATCTCCCTCGTCT   |
| prophenoloxidase activating enzyme     | PPAE-F         | GGAGGAATCTTGGATGTAGG   |
|                                        | PPAE-R         | CTGATACGGACACGCAAT     |
| Serpín-5                               | Spn5-F         | AGCCAGACTTAGCCAAC      |
|                                        | Spn5-R         | CCGATTCCGTGACCTCTA     |

Table S2. Differential expressed genes of Toll and Imd signaling pathway at 96 h.

| Gene ID       | GO_term                                                                                              | Go_description                                                                                                                                                                          | KO_name | Pathway_definition                                                                                                                                                                                                                                                                                                                                                                                                                                                                                                                                                                                                                                                                                                                                                                                                                                                                                                                                             |
|---------------|------------------------------------------------------------------------------------------------------|-----------------------------------------------------------------------------------------------------------------------------------------------------------------------------------------|---------|----------------------------------------------------------------------------------------------------------------------------------------------------------------------------------------------------------------------------------------------------------------------------------------------------------------------------------------------------------------------------------------------------------------------------------------------------------------------------------------------------------------------------------------------------------------------------------------------------------------------------------------------------------------------------------------------------------------------------------------------------------------------------------------------------------------------------------------------------------------------------------------------------------------------------------------------------------------|
| BGIBMGA012217 | biological_process;;molecular_function;                                                              | BP:proteolysis;;MF:serine-type endopeptidase activity;;                                                                                                                                 | MODSP   | Toll and Imd signaling pathway                                                                                                                                                                                                                                                                                                                                                                                                                                                                                                                                                                                                                                                                                                                                                                                                                                                                                                                                 |
| BGIBMGA002397 |                                                                                                      |                                                                                                                                                                                         | SPZ     | Toll and Imd signaling pathway                                                                                                                                                                                                                                                                                                                                                                                                                                                                                                                                                                                                                                                                                                                                                                                                                                                                                                                                 |
| BGIBMGA005140 | biological_process;;molecular_function;;molecular_function;;                                         | BP:regulation of transcription from RNA polymerase II promoter;;MF:transcription factor activity, sequence-specific DNA binding;;MF:sequence-specific DNA binding;;                     | FOSLN   | MAPK signaling pathway - fly;;Apoptosis - fly;;Toll and Imd signaling pathway                                                                                                                                                                                                                                                                                                                                                                                                                                                                                                                                                                                                                                                                                                                                                                                                                                                                                  |
| BGIBMGA005834 |                                                                                                      |                                                                                                                                                                                         | NFKBIA  | Leishmaniasis;;HTLV-I infection;;Chagas disease;;IL-17 signaling pathway;;Toxoplasmosis;;Hepatitis C;;Hepatitis B;;Th17 cell differentiation;;Th1 and Th2 cell differentiation;;Influenza A;;Herpes simplex infection;;Epstein-Barr virus infection;;B cell receptor signaling pathway;;Apoptosis;;Cytosolic DNA-sensing pathway;;RIG-I-like receptor signaling pathway;;Legionellosis;;Toll-like receptor signaling pathway;;NOD-like receptor signaling pathway;;Shigellosis;;Toll and Imd signaling pathway;;Osteoclast differentiation;;Neurotrophin signaling pathway;;Small cell lung cancer;;Viral carcinogenesis;;T cell receptor signaling pathway;;Pathways in cancer;;TNF signaling pathway;;cAMP signaling pathway;;Adipocytokine signaling pathway;;Chemokine signaling pathway;;NF-kappa B signaling pathway;;Prostate cancer;;Chronic myeloid leukemia;;Epithelial cell signaling in Helicobacter pylori infection;;Measles;;Insulin resistance |
| BGIBMGA014370 |                                                                                                      |                                                                                                                                                                                         | TL      | Toll and Imd signaling pathway                                                                                                                                                                                                                                                                                                                                                                                                                                                                                                                                                                                                                                                                                                                                                                                                                                                                                                                                 |
| BGIBMGA005738 |                                                                                                      |                                                                                                                                                                                         | ANK     | Proteoglycans in cancer;;Toll and Imd signaling pathway                                                                                                                                                                                                                                                                                                                                                                                                                                                                                                                                                                                                                                                                                                                                                                                                                                                                                                        |
| BGIBMGA011607 | biological_process;;biological_process;;cellular_component;;molecular_function;;molecular_function;; | BP:regulation of innate immune response;;BP:carbohydrate metabolic process;;CC:extracellular region;;MF:carbohydrate binding;;MF:hydrolase activity, hydrolyzing O-glycosyl compounds;; | GNBP3   | Toll and Imd signaling pathway                                                                                                                                                                                                                                                                                                                                                                                                                                                                                                                                                                                                                                                                                                                                                                                                                                                                                                                                 |

|               |                                                                                                                                              |                                                                                                                                                                                                                           |            |                                                                                                                                                                                                                                                                                                                                                                                                                                                                                                                                                                                                                                                                                                                                                                                                                                                               |
|---------------|----------------------------------------------------------------------------------------------------------------------------------------------|---------------------------------------------------------------------------------------------------------------------------------------------------------------------------------------------------------------------------|------------|---------------------------------------------------------------------------------------------------------------------------------------------------------------------------------------------------------------------------------------------------------------------------------------------------------------------------------------------------------------------------------------------------------------------------------------------------------------------------------------------------------------------------------------------------------------------------------------------------------------------------------------------------------------------------------------------------------------------------------------------------------------------------------------------------------------------------------------------------------------|
| BGIBMGA012215 | biological_process;;molecular_function;                                                                                                      | BP:proteolysis;;MF:serine-type endopeptidase activity;;                                                                                                                                                                   | MODSP      | Toll and Imd signaling pathway                                                                                                                                                                                                                                                                                                                                                                                                                                                                                                                                                                                                                                                                                                                                                                                                                                |
| BGIBMGA011609 | biological_process;;biological_process;;biological_process;;cellular_component;;molecular_function;;molecular_function;;                     | BP:carbohydrate metabolic process;;BP:regulation of innate immune response;;BP:defense response to bacterium;;CC:extracellular region;;MF:carbohydrate binding;;MF:hydrolase activity, hydrolyzing O-glycosyl compounds;; | GNBP1      | Toll and Imd signaling pathway                                                                                                                                                                                                                                                                                                                                                                                                                                                                                                                                                                                                                                                                                                                                                                                                                                |
| BGIBMGA005478 | biological_process;;biological_process;;biological_process;;cellular_component;;molecular_function;;molecular_function;;molecular_function;; | BP:response to oxidative stress;;BP:cellular oxidant detoxification;;BP:oxidation-reduction process;;CC:integral component of membrane;;MF:heme binding;;MF:calcium ion binding;;MF:peroxidase activity;;                 | DUOX, THOX | MAPK signaling pathway - fly;;Toll and Imd signaling pathway                                                                                                                                                                                                                                                                                                                                                                                                                                                                                                                                                                                                                                                                                                                                                                                                  |
| BGIBMGA006244 |                                                                                                                                              |                                                                                                                                                                                                                           | TL         | Toll and Imd signaling pathway                                                                                                                                                                                                                                                                                                                                                                                                                                                                                                                                                                                                                                                                                                                                                                                                                                |
| BGIBMGA006017 |                                                                                                                                              |                                                                                                                                                                                                                           | PIRK       | Toll and Imd signaling pathway                                                                                                                                                                                                                                                                                                                                                                                                                                                                                                                                                                                                                                                                                                                                                                                                                                |
| BGIBMGA006018 |                                                                                                                                              |                                                                                                                                                                                                                           | PIRK       | Toll and Imd signaling pathway                                                                                                                                                                                                                                                                                                                                                                                                                                                                                                                                                                                                                                                                                                                                                                                                                                |
| BGIBMGA002463 | biological_process;;cellular_component;;cellular_component;;molecular_function;;molecular_function;;                                         | BP:regulation of transcription, DNA-templated;;CC:cytoplasm;;CC:nucleus;;MF:transcription factor activity, sequence-specific DNA binding;;MF:DNA binding;;                                                                | NFKB1      | Leishmaniasis;;HTLV-I infection;;Chagas disease;;IL-17 signaling pathway;;Toxoplasmosis;;Amoebiasis;;Hepatitis B;;Ras signaling pathway;;Th17 cell differentiation;;Th1 and Th2 cell differentiation;;MAPK signaling pathway;;Herpes simplex infection;;Epstein-Barr virus infection;;B cell receptor signaling pathway;;Longevity regulating pathway;;Apoptosis;;Sphingolipid signaling pathway;;Hepatitis C;;Adipocytokine signaling pathway;;Pertussis;;RIG-I-like receptor signaling pathway;;Legionellosis;;Toll-like receptor signaling pathway;;NOD-like receptor signaling pathway;;Shigellosis;;Toll and Imd signaling pathway;;Osteoclast differentiation;;Influenza A;;Cocaine addiction;;Neurotrophin signaling pathway;;Small cell lung cancer;;Tuberculosis;;MicroRNAs in cancer;;Viral carcinogenesis;;Transcriptional misregulation in cancer |

cer;;T cell receptor signaling pathway;;Pathways in cancer;;Inflammatory bowel diseases;;Salmonella infection;;TNF signaling pathway;;cAMP signaling pathway;;Fluid shear stress and atherosclerosis;;Chemokine signaling pathway;;NF-kappa B signaling pathway;;HIF-1 signaling pathway;;Cytosolic DNA-sensing pathway;;Prostate cancer;;Acute myeloid leukemia;;Pancreatic cancer;;Chronic myeloid leukemia;;Epithelial cell signaling in Helicobacter pylori infection;;PI3K-Akt signaling pathway;;Measles;;Antifolate resistance;;Prolactin signaling pathway;;Non-alcoholic fatty liver diseases;;AGE-RAGE signaling pathway in diabetic complications;;Insulin resistance
